# Supplementary material for: Local reactivity descriptors to decipher the electrochemical hydrogenation of unsaturated carboxylic acids
Source: Royal Society of Chemistry journal article supplement (doi:10.1039/d3gc02909c), 2023-01-01
Supplement: d3gc02909c1.pdf [file d3gc02909c1.pdf]

*Supplementary Information*

**Local reactivity descriptors to decipher the electrochemical hydrogenation  
of unsaturated carboxylic acids†**

Marco Nazareno Dell'Anna,<sup>a,b,†</sup> Geet Gupta,<sup>a,b,†</sup> Prathamesh T. Prabhu,<sup>a,b</sup> Ting-Hung Chu,<sup>a,b</sup>  
Luke T. Roling,<sup>\*a,b</sup> and Jean-Philippe Tessonnier<sup>\*a,b</sup>

<sup>a</sup> Dept. of Chemical and Biological Engineering, Iowa State University, Ames, IA 50011, USA.

<sup>b</sup> Center for Biorenewable Chemicals (CBiRC), Ames, IA 50011, USA.

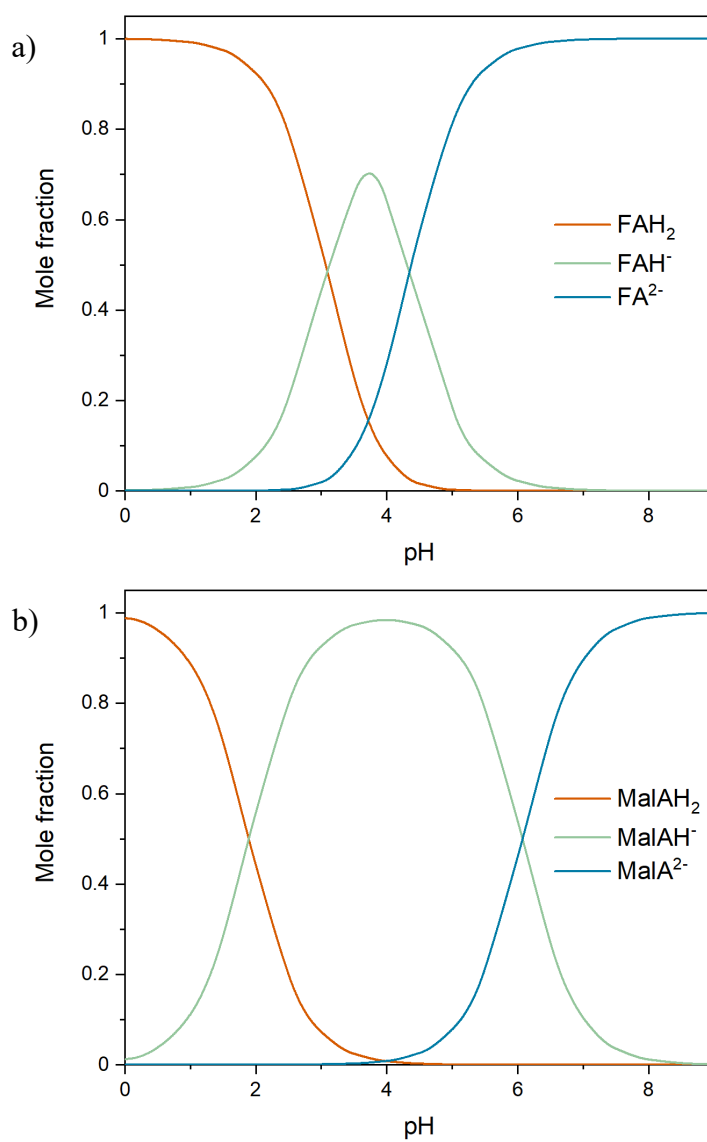

**Figure S1.** Speciation diagrams for (a) fumaric acid ( $\text{pK}_{\text{a}1}=3.03$  and  $\text{pK}_{\text{a}2}=4.57$ ), and (b) maleic acid ( $\text{pK}_{\text{a}1}=1.9$  and  $\text{pK}_{\text{a}2}=6.07$ ). The diagrams show the relative abundance of the diprotic, monoprotic, and fully deprotonated species.

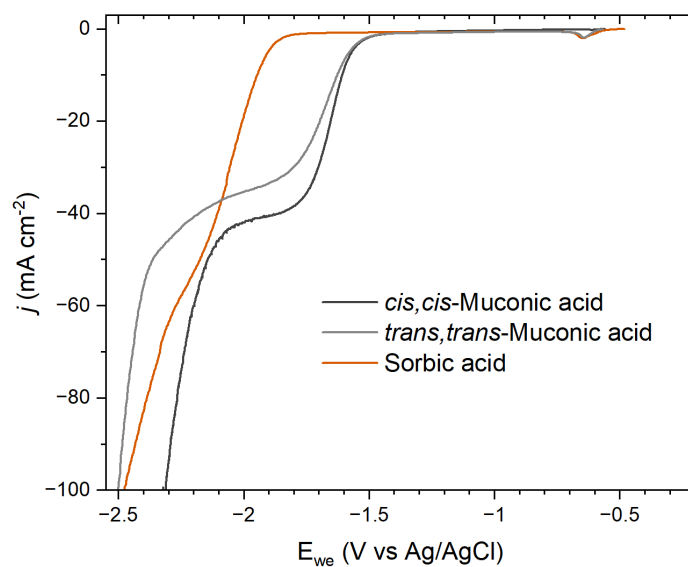

**Figure S2.** Current-potential polarization curves on Pb RDE for 5 g/L solutions of *cis,cis*-muconic acid, *trans,trans*-muconic acid, and sorbic acid at pH 7. The two isomers show the same onset potential for the hydrogenation reaction at -1.55 V while the onset is shifted to -1.90 V for sorbic acid.

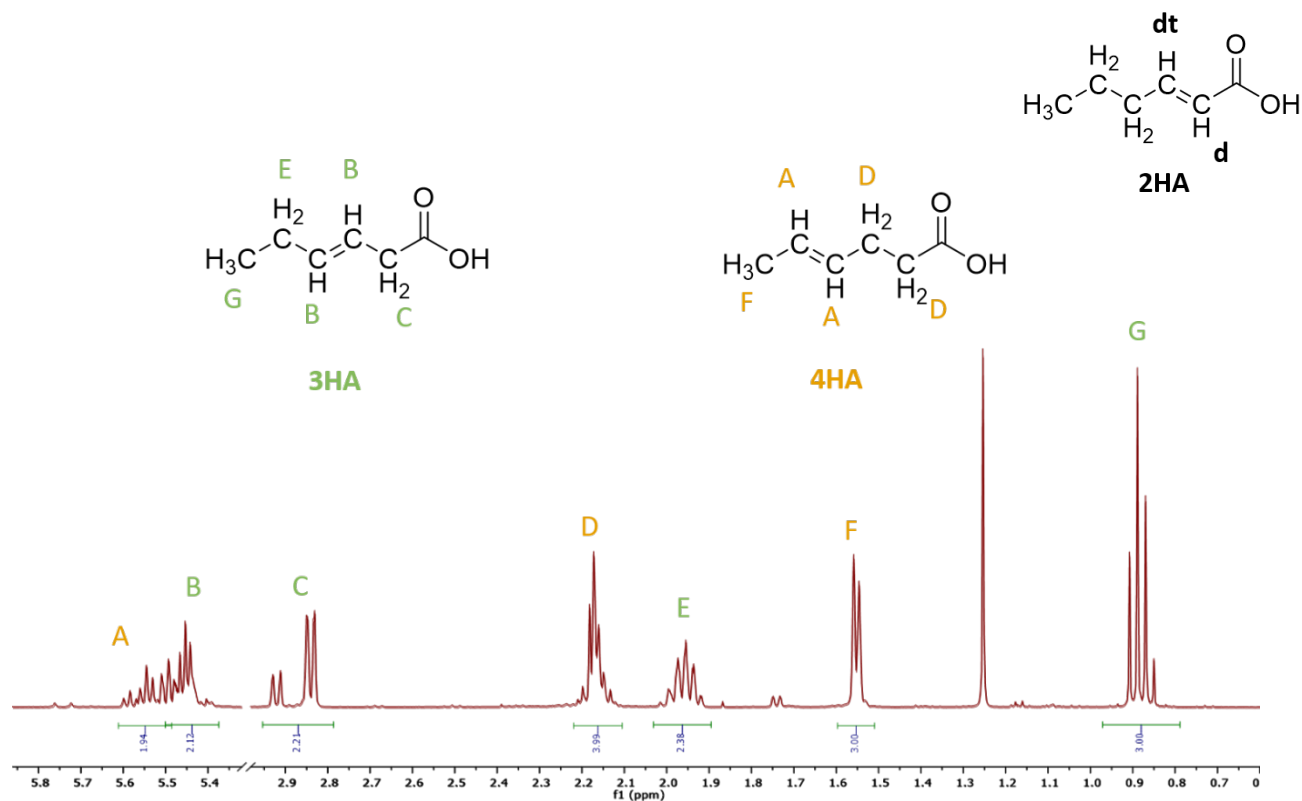

**Figure S3.**  $^1\text{H}$  NMR spectrum of the solution collected after bulk electrolysis of sorbic acid. The products were identified and quantified by following the criteria of splitting ( $n+1$  rule), integration, and chemical shift. **3HA:** B  $\delta$  5.43 ppm (m, 2H), C  $\delta$  2.84 ppm (d,  $J$  = 6.8 Hz, 2H), E  $\delta$  1.96 ppm (p,  $J$  = 7.4, 6.9 Hz, 2H), G  $\delta$  0.88 ppm (t,  $J$  = 7.7 Hz, 3H). **4HA:** A  $\delta$  5.55 ppm (m, 2H), D  $\delta$  2.17 ppm (hept,  $J$  = 6.3, 4.8, 4.3, 4.2 Hz, 4H), F  $\delta$  1.55 ppm (d,  $J$  = 5.0 Hz, 3H). **2HA** was not detected as it would have shown two distinctive peaks in the olefin region,  $\delta$  5.9 ppm (d,  $J$  = 15.7 Hz, 1H),  $\delta$  7.15 ppm (dt,  $J$  = 15.7, 6.8 Hz, 1H). Such peaks are absent in the spectrum.

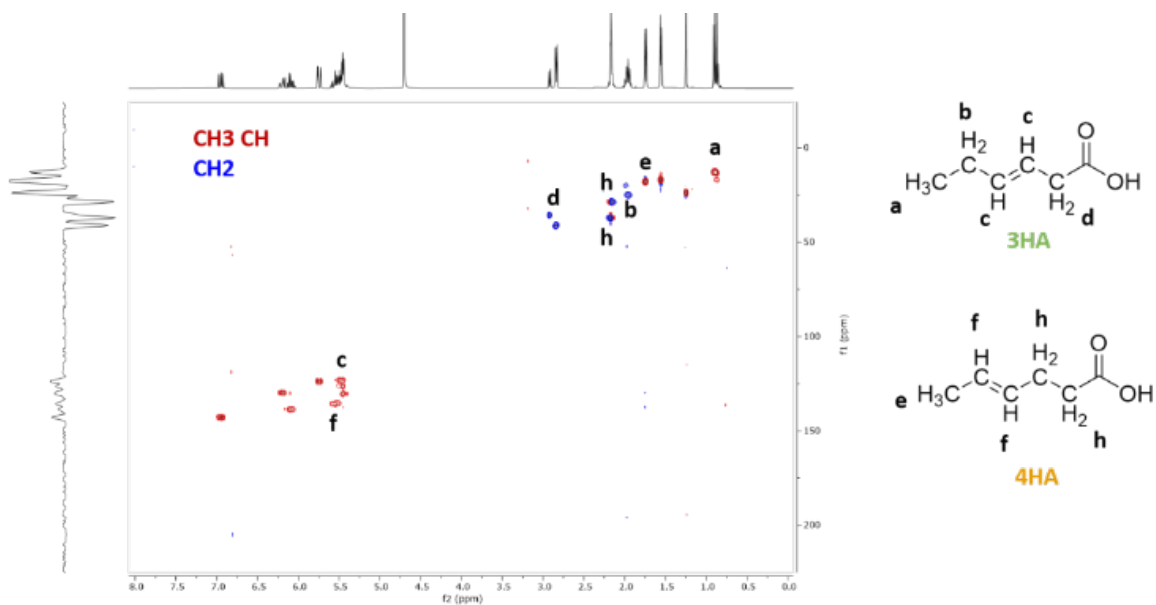

**Figure S4.** NMR HSQC spectrum of the solution collected after bulk electrolysis of sorbic acid. CH<sub>2</sub> groups and CH<sub>3</sub>/CH groups appear in blue and red, respectively.

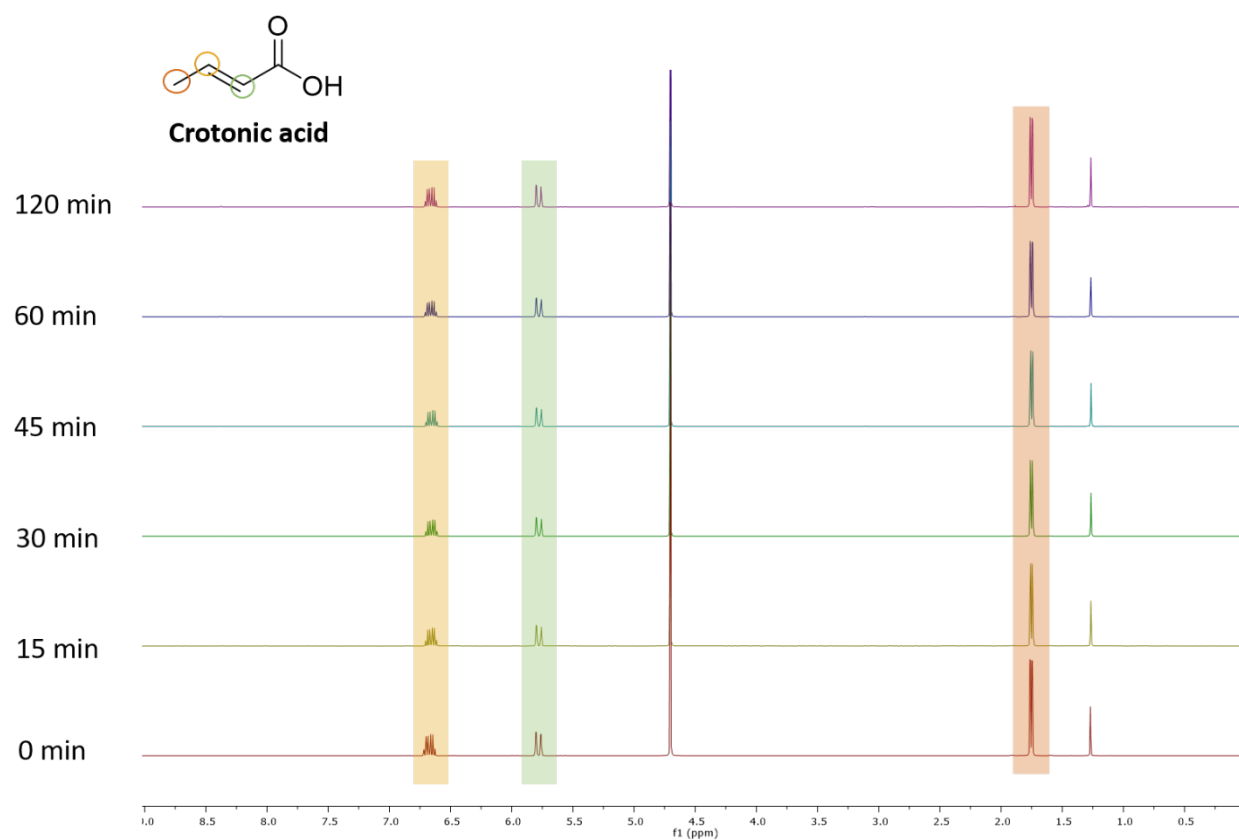

**Figure S5.** <sup>1</sup>H NMR spectra collected during bulk electrolysis of crotonic acid at constant current (200 mA cm<sup>-2</sup>). No products could be detected during the 2-hour reaction.

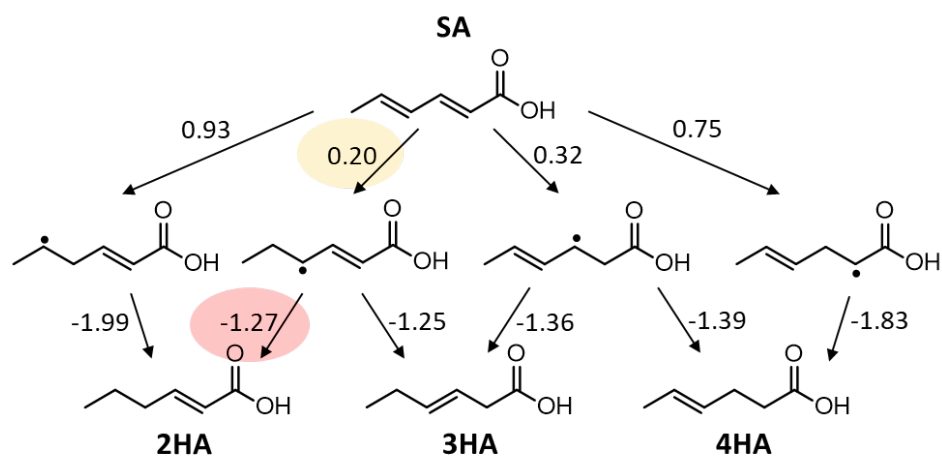

**Figure S6.** Changes in free energy (eV) for the sequential addition of  $\text{H}^+|\text{e}^-$  pairs to sorbic acid (SA) to form the hydrogenated hexenoic acid products. Energetics are presented at -0.48 V vs. Ag/AgCl for consistency with Fig. 1 of the main text. Following the minimum-energy pathway does not predict the experimental product distribution.

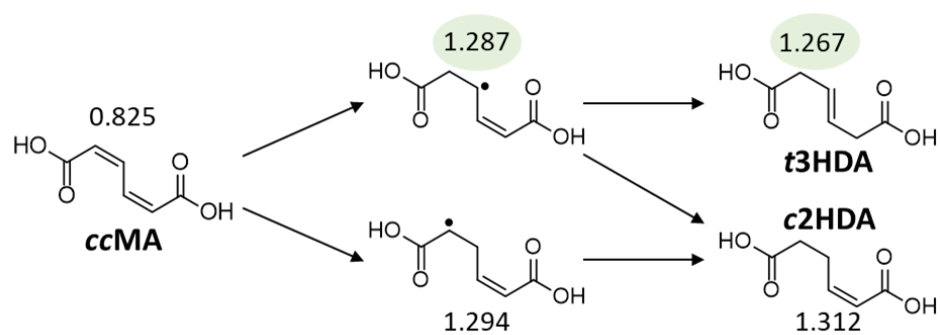

**Figure S7.** LUMO energies (eV) of species involved in *cis,cis*-muconic acid (*ccMA*) electrohydrogenation to hexenedioic acid products. The species with the lowest LUMO energies are those observed experimentally.

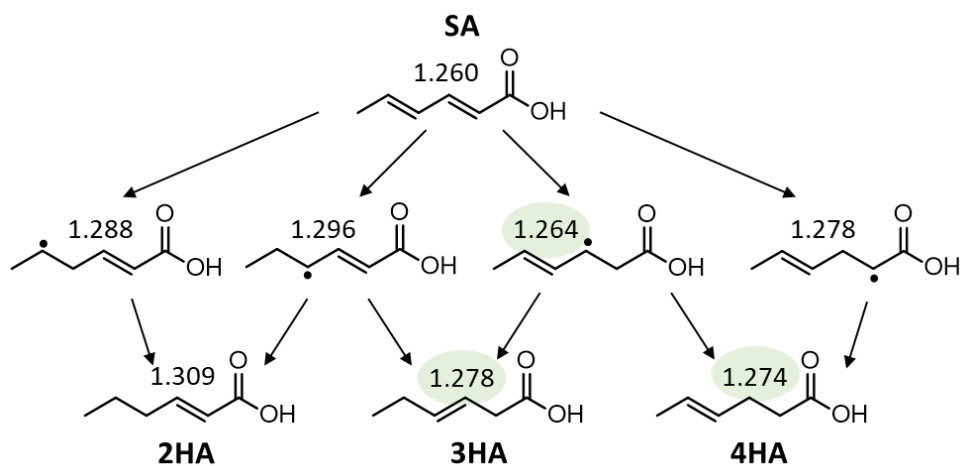

**Figure S8.** LUMO energies (eV) of species involved in sorbic acid (SA) electrohydrogenation to hexenoic acid products. The species with the lowest LUMO energies are those observed experimentally.

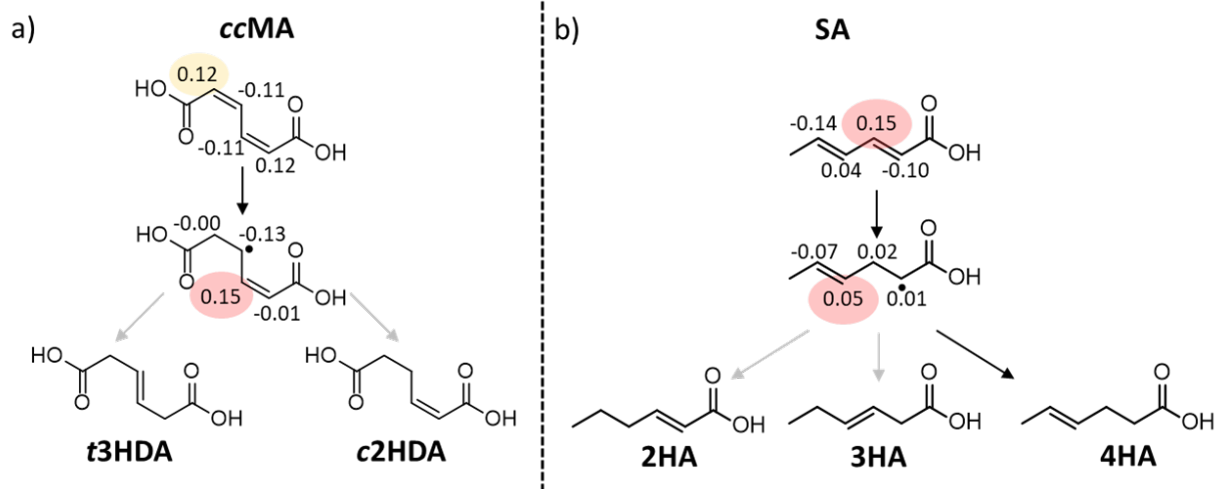

**Figure S9.** LUMO coefficients (given by 2p<sub>z</sub> eigenvalues) of (a) *cis,cis*-muconic acid (ccMA) and (b) sorbic acid (SA). Included are the intermediates formed by hydrogenation at the 2p<sub>z</sub>-predicted most favorable sites (yellow).
